# Supplementary material for: Bikinin-like inhibitors targeting GSK3/Shaggy-like kinases: characterisation of novel compounds and elucidation of their catabolism in planta
Source: PubMed Central journal article supplement (PMC4078015; doi:10.1186/1471-2229-14-172), 2014-06-19
Supplement: 1471-2229-14-172-S1.pdf [file 1471-2229-14-172-S1.pdf]

**Additional file 1: Compounds synthesised**

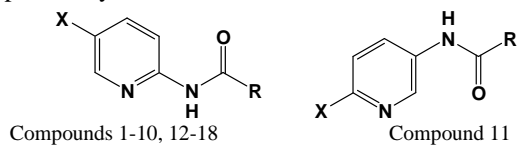

| No.             | Reaction compounds                                    | Method | X               | R | Yield | $\lambda_1; \lambda_2^a$ | $pK_a^b$ |
|-----------------|-------------------------------------------------------|--------|-----------------|---|-------|--------------------------|----------|
| 1               | 2-Amino-5-chloropyridine,<br>Methyl oxalyl chloride   | D      | Cl              |   | 39%   | 254; 291                 |          |
| 2               | 2-Amino-5-chloropyridine,<br>Methyl malonyl chloride  | D      | Cl              |   | 30%   | 245; 287                 |          |
| 3               | 2-Amino-5-chloropyridine,<br>Succinic anhydride       | A      | Cl              |   | 54%   | 245; 287                 | 5.4      |
| 4               | 2-Amino-5-chloropyridine,<br>Glutaric anhydride       | A      | Cl              |   | 71%   | 245; 288                 |          |
| 5               | 2-Amino-5-chloropyridine,<br>Methyl adipoyl chloride  | D      | Cl              |   | 20%   | 245; 288                 |          |
| 6               | 2-Amino-5-chloropyridine,<br>Maleic anhydride         | A      | Cl              |   | 22%   | 222; 298                 |          |
| 7               | 2-Amino-5-chloropyridine,<br>Phthalic anhydride       | A      | Cl              |   | 63%   | 249; 289                 |          |
| 8               | 2-Amino-5-chloropyridine,<br>Methyl malonyl chloride  | C      | Cl              |   | 41%   | 245; 287                 |          |
| 9               | 2-Amino-5-chloropyridine,<br>Methyl succinyl chloride | C      | Cl              |   | 33%   | 245; 288                 |          |
| 10              | 2-Amino-5-iodopyridine,<br>Methyl succinyl chloride   | C      | I               |   | 30%   | 252; 293                 |          |
| 11              | 5-Amino-2-chloropyridine,<br>Succinic anhydride       | A      | Cl              |   | 69%   | 248; 284                 |          |
| 12              | 2-Aminopyridine,<br>Succinic anhydride                | A      | H               |   | 74%   | 235; 276                 | 4.9      |
| 13              | 2-Amino-5-fluoropyridine,<br>Succinic anhydride       | A      | F               |   | 68%   | 235; 283                 |          |
| 14 <sup>c</sup> | 2-Amino-5-bromopyridine,<br>Succinic anhydride        | A      | Br              |   | 65%   | 247; 289                 | 5.6      |
| 15              | 2-Amino-5-iodopyridine,<br>Succinic anhydride         | A      | I               |   | 35%   | 252; 292                 | 5.8      |
| 16              | 2-Amino-5-nitropyridine,<br>Succinic anhydride        | B      | NO <sub>2</sub> |   | 29%   | 221; 350                 |          |
| 17              | 2-Amino-5-iodopyridine,<br>Methyl oxalyl chloride     | D      | I               |   | 28%   | 253; 293                 |          |
| 18              | 2-Amino-5-bromopyridine,<br>Methyl succinyl chloride  | C      | Br              |   | 39%   | 247; 289                 |          |

<sup>a</sup> Absorption maxima in nm (measured in 15% ACN containing 20 mM sodium acetate buffer pH 4.8).

<sup>b</sup> The  $pK_a$  (negative decadic logarithm of the dissociation constant) of the carboxylic acid group was determined in 50% (v/v) methanol due to limited solubility of the compounds in water.

<sup>c</sup> Compound **14** is bikinin.
