# Supplementary material for: Bikinin-like inhibitors targeting GSK3/Shaggy-like kinases: characterisation of novel compounds and elucidation of their catabolism in planta
Source: PubMed Central journal article supplement (PMC4078015; doi:10.1186/1471-2229-14-172), 2014-06-19
Supplement: 1471-2229-14-172-S3.pdf [file 1471-2229-14-172-S3.pdf]

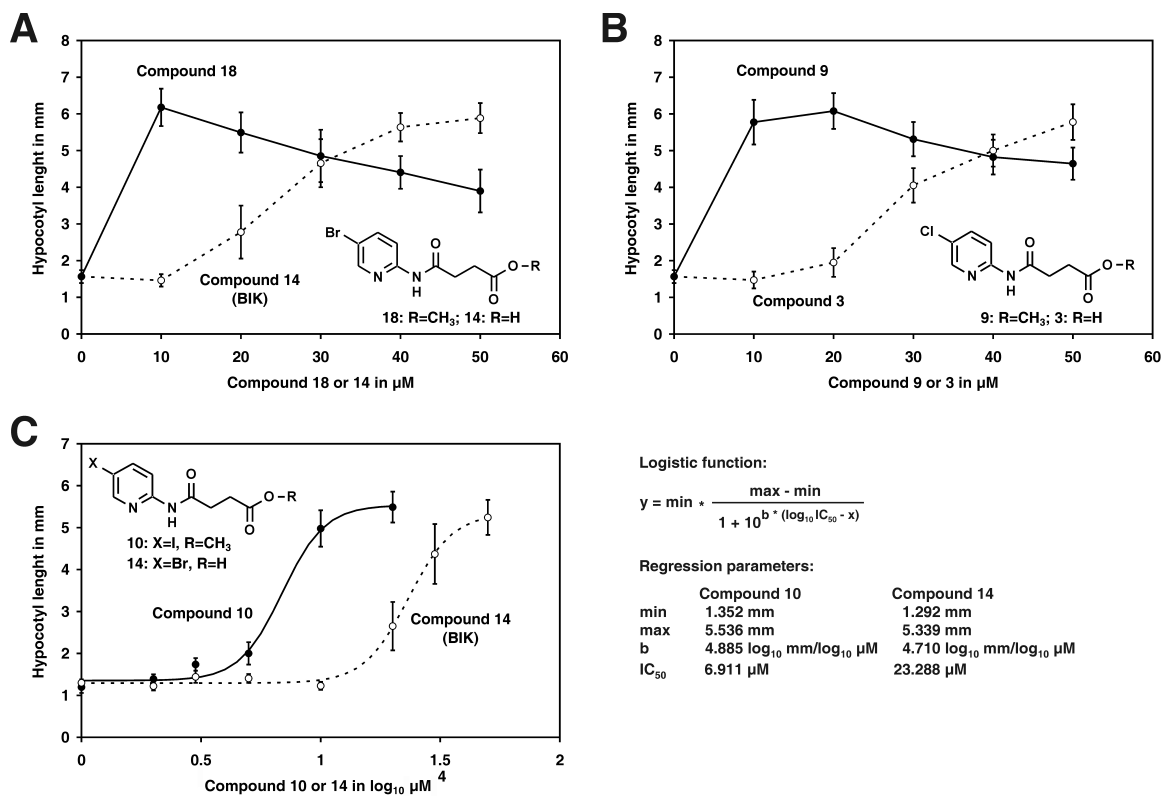

**Additional file 3:** Effect of methylated and unmethylated derivatives on hypocotyl length. (A) The hypocotyl length of 7-day-old *A. thaliana* Col-0 seedlings grown on ½ MS medium containing 1% sucrose and supplemented with compound **18** or **14** (BIK, bikinin) at the indicated concentrations was measured. (B) The same experimental setup as in (A) was used to test compounds **9** and **3**. The means and standard deviations were calculated from at least 22 seedlings. (C) Comparison of compound **10** and **14** (BIK, bikinin). The hypocotyl length of plants grown on different concentrations of both concentrations was measured as described above. The data were fitted using a logistic function (solid and dotted line) and the IC<sub>50</sub> values were calculated.
