# Supplementary material for: Bikinin-like inhibitors targeting GSK3/Shaggy-like kinases: characterisation of novel compounds and elucidation of their catabolism in planta
Source: PubMed Central journal article supplement (PMC4078015; doi:10.1186/1471-2229-14-172), 2014-06-19
Supplement: 1471-2229-14-172-S4.pdf [file 1471-2229-14-172-S4.pdf]

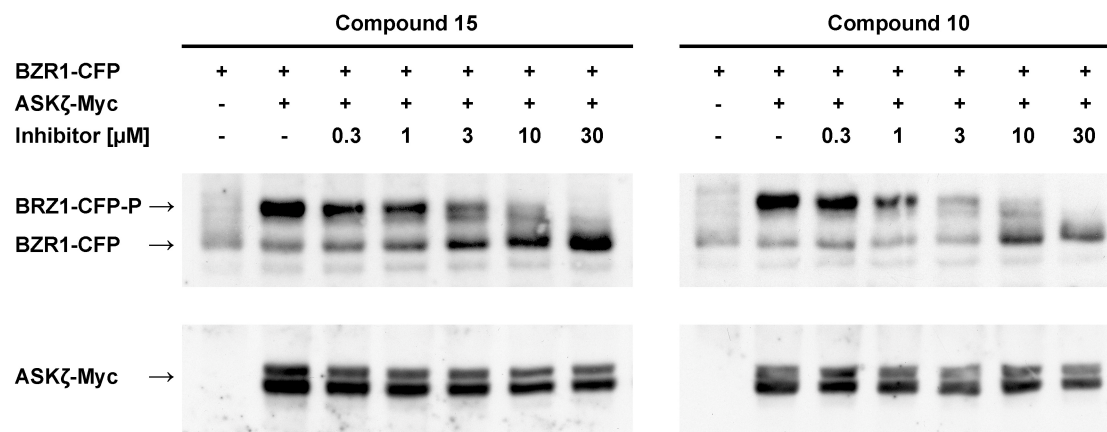

**Additional file 4:** Compounds **10** and **15** are potent inhibitors *in vivo*. *A. thaliana* protoplasts were co-transformed with expression constructs for BZR1-CFP and Myc-tagged ASK $\zeta$  and treated with compounds **10** and **15** at the indicated concentrations. BZR1-CFP and ASK $\zeta$ -Myc were detected by western blot analysis using monoclonal anti-GFP and anti-Myc antibodies, respectively. Depending on the ASK $\zeta$  kinase activity BZR1-CFP occurs in a phosphorylated or unphosphorylated form (indicated by arrows). ASK $\zeta$ -Myc appeared as two bands indicating posttranslational modification of this protein. ASK $\zeta$  was selected for this experiment since BIN2 is not expressed in the protoplast system.
