# Supplementary material for: Bikinin-like inhibitors targeting GSK3/Shaggy-like kinases: characterisation of novel compounds and elucidation of their catabolism in planta
Source: PubMed Central journal article supplement (PMC4078015; doi:10.1186/1471-2229-14-172), 2014-06-19
Supplement: 1471-2229-14-172-S7.pdf [file 1471-2229-14-172-S7.pdf]

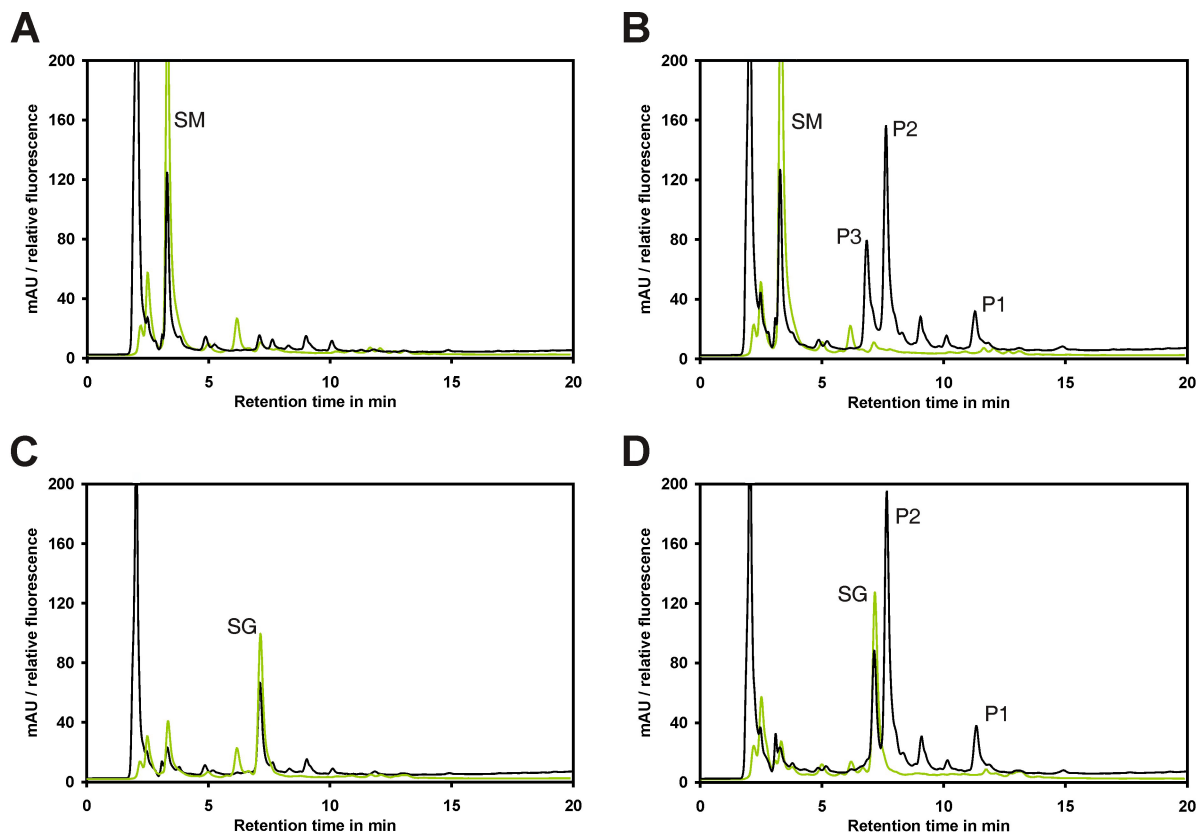

**Additional file 7:** Detection of sinapoylmalate (SM) and sinapoylglucose (SG) by HPLC. Chromatograms of extracts derived from (A) untreated Col-0, (B) Col-0 treated with 50 μM compound **10**, (C) untreated *sng1* and (D) *sng1* treated with 50 μM compound **10**. For detection the absorbance at 250 nm (black line) and the fluorescence ( $\lambda_{Ex}$ : 335 nm/ $\lambda_{Em}$ : 450 nm; green line) was recorded.
